# Supplementary material
Source: PubMed Central journal article supplement (PMC4974089)
Supplement: mmc1.pdf [file mmc1.pdf]

**Supplemental Data**

**TTC25 Deficiency Results in Defects of the  
Outer Dynein Arm Docking Machinery and Primary Ciliary  
Dyskinesia with Left-Right Body Asymmetry Randomization**

**Julia Wallmeier, Hidetaka Shiratori, Gerard W. Dougherty, Christine Edelbusch, Rim Hjeij, Niki T. Loges, Tabea Menchen, Heike Olbrich, Petra Pennekamp, Johanna Raidt, Claudius Werner, Katsura Minegishi, Kyosuke Shinohara, Yasuko Asai, Katsuyoshi Takaoka, Chanjae Lee, Matthias Giese, Yasin Memari, Richard Durbin, Anja Kolb-Kokocinski, Sascha Sauer, John B. Wallingford, Hiroshi Hamada, and Heymut Omran**

**Supplemental Material:**

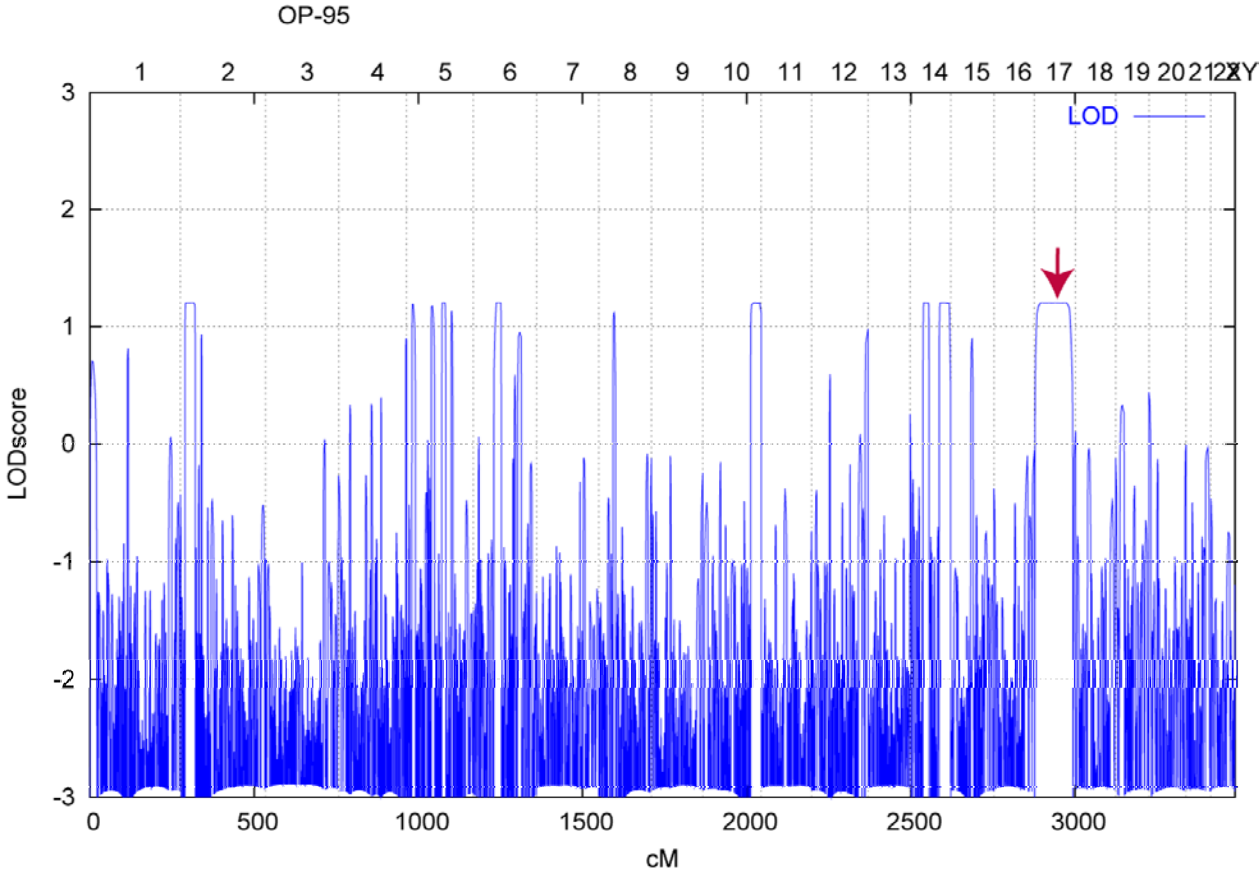

**Figure S1:** SNP-Haplotype analysis of OP-95 II1; cM: centimorgan, Allegro LOD score: logarithm of the odds

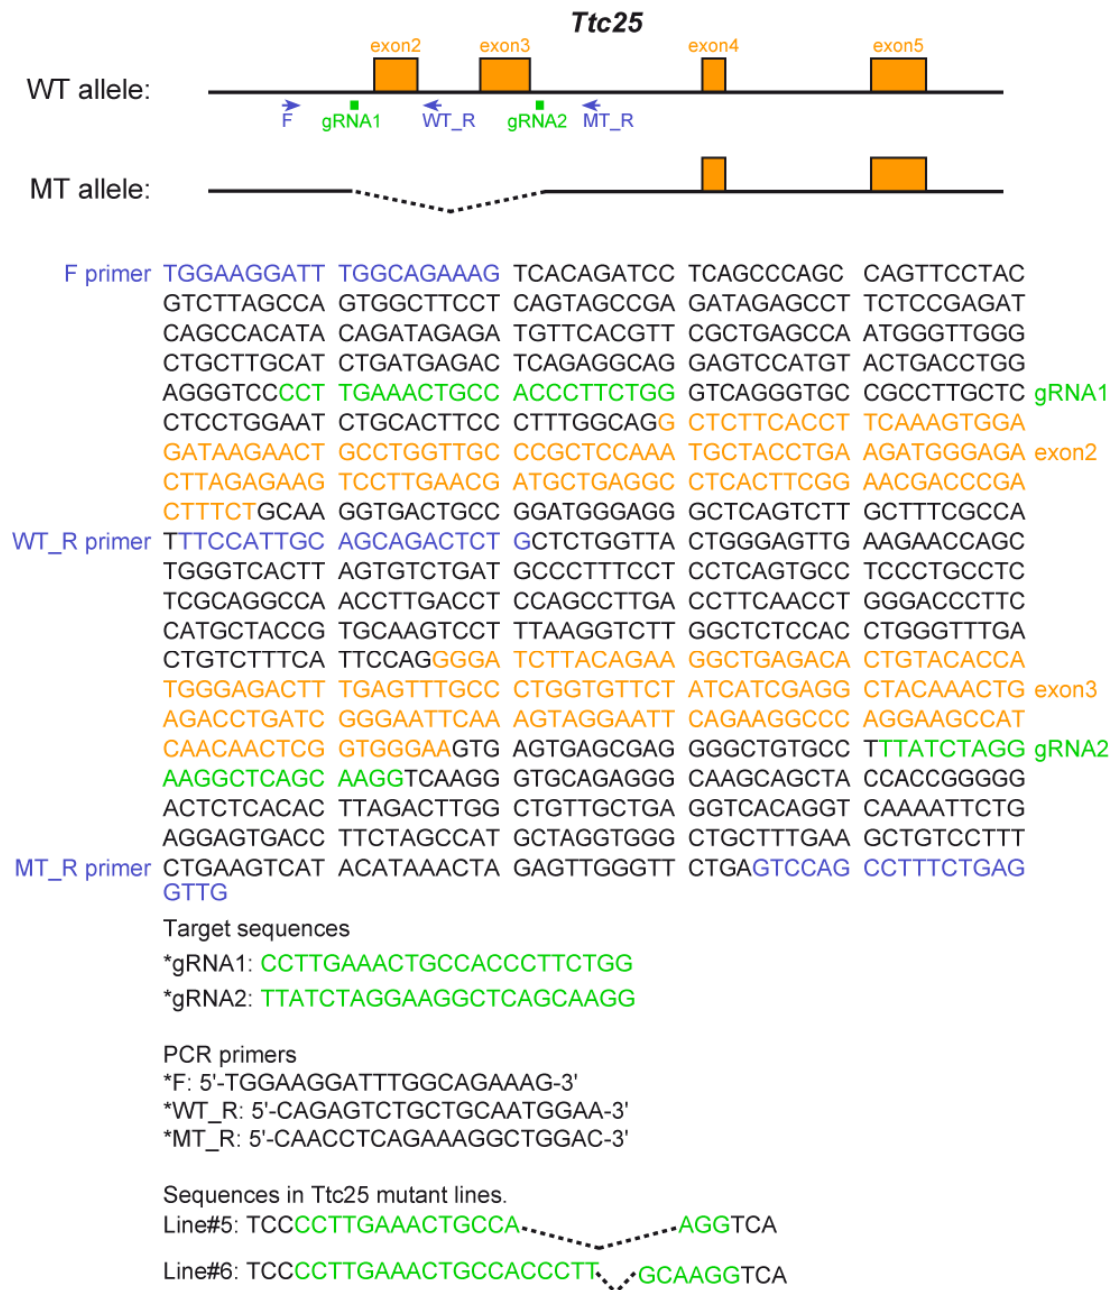

**Figure S2:** Generation of mutant mice by CRISPR/Cas9 system.

*Ttc25* mutant mice were generated with the use of the clustered regularly interspersed short palindromic repeats (CRISPR)/Cas9 system. Two small guide RNAs (sgRNAs) designed to delete *Ttc25* exons 2 and 3 were produced by *in vitro* transcription (IVT) with the use of a MEGA short script T7 kit (Ambion, AM1354) essentially as previously described. Capped synthetic mRNA for Cas9 was transcribed from the Cas9/pSP64T vector with the use of an SP6 mMessage mMachine Kit (Ambion, AM1340). Cas9 mRNA and the two sgRNAs were injected into C57BL/6 fertilized eggs as previously described<sup>24</sup>. The pups were genotyped by polymerase chain reaction (PCR) and subsequent sequence analysis. The primers used were F: 5'-TGG AAG GATT TGG CAG AAA G and MT\_R: 5'-CAACCTCAGAAAGGCTGGAC.

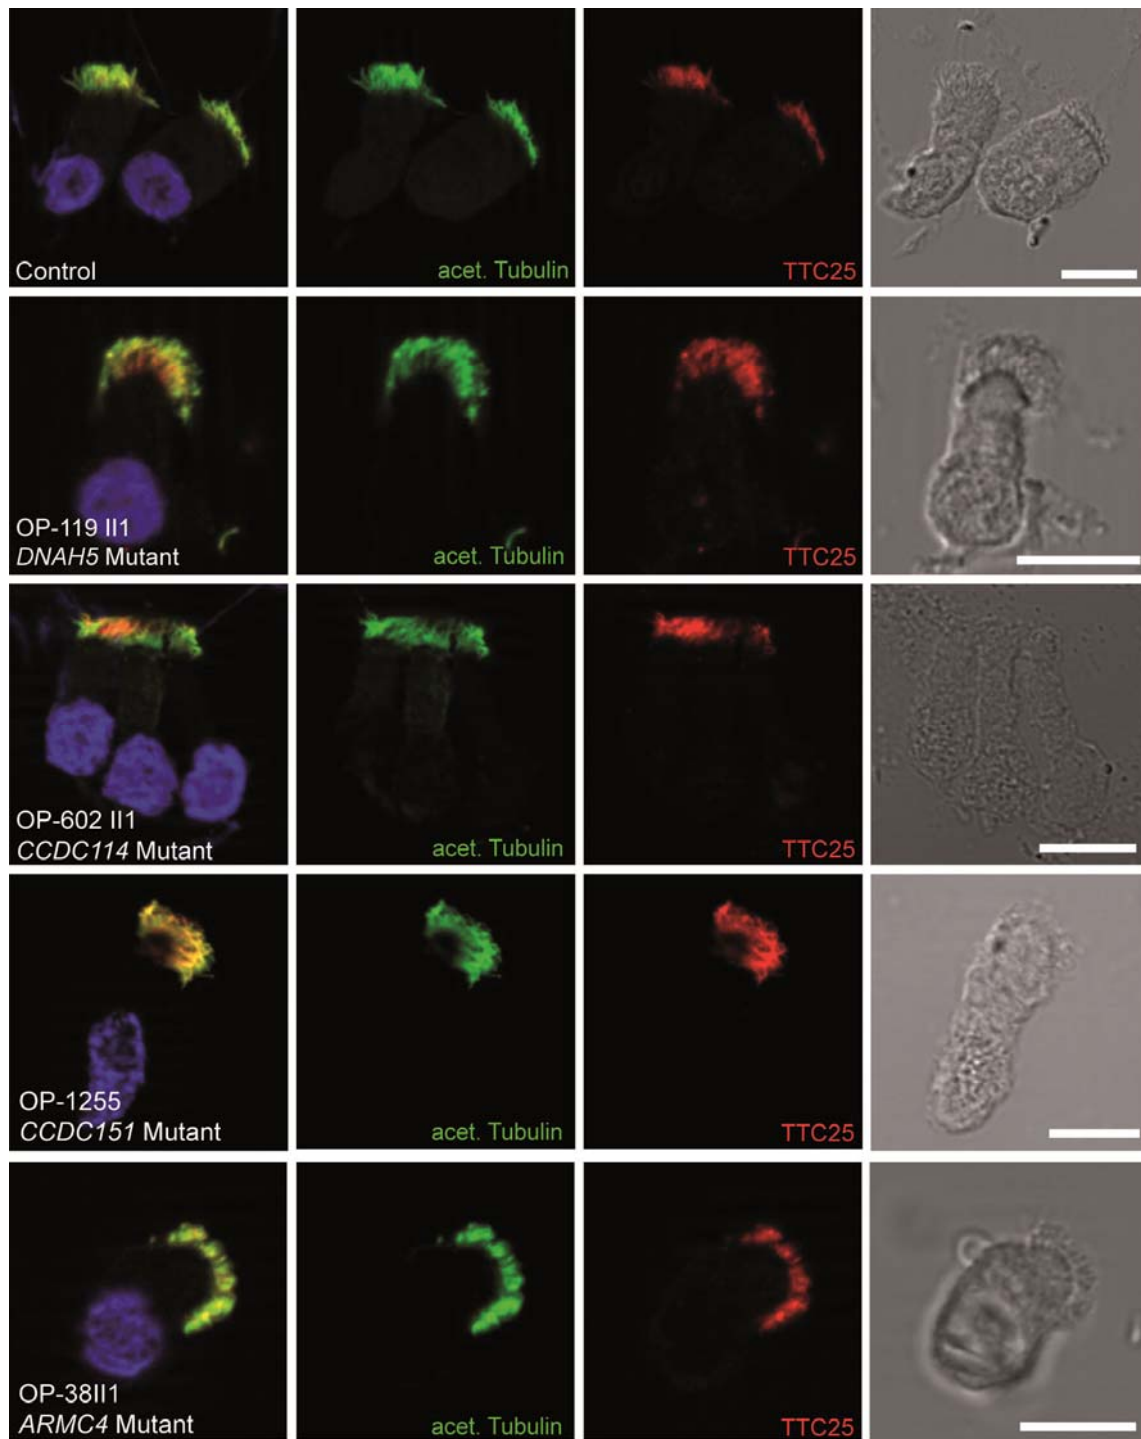

**Figure S3:** TTC25 is detectable in ODA-HC and ODA-DC mutant cilia.

Respiratory cilia from control and PCD individual (OP-119 II1) carrying *DNAH5* LOF-mutations were double labeled with antibodies directed against acetylated Tubulin and TTC25. Respiratory cilia from control and PCD individuals with ODA-DC defects carrying LOF-mutations in *CCDC114* (OP-602 II1), *CCDC151* (OP-1255) and *ARMC4* (OP-38 II1) respectively were double labeled with antibodies directed against acetylated tubulin and TTC25. Yellow color represents co-localization of TTC25 and acetylated tubulin. Nuclei (blue) were stained with Hoechst33342. Scale bars represent 10 $\mu$ m.

**Table S1:** Rare variants in the homozygous region (17:5961695-78901893) of OP-95II1 (Frameshift, Splice site-Substitution, Non-Synonymous Substitution, Variation frequency <0.005)

| Gene         | Ensembl gene number             | cDNA level                        | Protein level      | Variation   | Variation frequency |
|--------------|---------------------------------|-----------------------------------|--------------------|-------------|---------------------|
| MYH4         | <a href="#">ENSG00000264424</a> | c.3833C>T                         | p.S1278L           | rs145453135 | 0.0003              |
| NT5M         | <a href="#">ENSG00000205309</a> | c.604_615del(CTGCAG)2ins(CTGCAG)3 | p.Q205_P206insLQ   | n.a.        | n.a.                |
| PHF12        | <a href="#">ENSG00000109118</a> | c.1534C>G                         | p.H512D            | n.a.        | n.a.                |
| GIT1         | <a href="#">ENSG00000108262</a> | c.1489G>A                         | p.A497T            | n.a.        | n.a.                |
| SLFN11       | <a href="#">ENSG00000172716</a> | c.766G>A                          | p.E256K            | n.a.        | n.a.                |
| SLFN12       | <a href="#">ENSG00000172123</a> | c.42G>C                           | p.L14F             | rs202085233 | 0.0002              |
| KRTAP29-1    | <a href="#">ENSG00000212658</a> | c.833A>G                          | p.K278R            | n.a.        | n.a.                |
| KRT32        | <a href="#">ENSG00000108759</a> | c.665C>G                          | p.S222C            | n.a.        | n.a.                |
| <b>TTC25</b> | <a href="#">ENSG00000204815</a> | <b>c.114+1G&gt;T</b>              | <b>Splice site</b> | <b>n.a.</b> | <b>n.a.</b>         |
| INTS2        | <a href="#">ENSG00000108506</a> | c.380C>T                          | p.T127M            | rs370752436 | 0.0002              |
| CASKIN2      | <a href="#">ENSG00000177303</a> | c.2635G>A                         | p.V879I            | n.a.        | n.a.                |
| GALR2        | <a href="#">ENSG00000182687</a> | c.1163G>C                         | p.*388S            | n.a.        | n.a.                |

n.a.: not available

**Table S2:** Rare variants in the shared homozygous region (17:16479171-66815637) of OP-1331 II1 and II2 (Frameshift, Splicesite-Substitution, Non-Synonymous Substitution, Variation frequency <0.005).

| Gene         | <u>Ensembl gene number</u>             | cDNA level                      | Protein level       | Variation   | Variation frequency |
|--------------|----------------------------------------|---------------------------------|---------------------|-------------|---------------------|
| EVI2A        | <a href="#">ENSG00000126860</a>        | c.494C>A                        | p.S165Y             | rs147909684 | 0.0003              |
| C17orf50     | <a href="#">ENSG00000154768</a>        | c.374G>A                        | p.R125Q             | n.a         | n.a                 |
| KRTAP1-1     | <a href="#">ENSG00000188581</a>        | c.125C>T                        | p.T42I              | n.a         | n.a                 |
| <b>TTC25</b> | <b><a href="#">ENSG00000204815</a></b> | <b>c.425_426insT</b>            | <b>p.K142Nfs*12</b> | <b>n.a</b>  | <b>n.a</b>          |
| KCNH4        | <a href="#">ENSG00000089558</a>        | c.2696G>A                       | p.R899Q             | n.a         | n.a                 |
| FAM187A      | <a href="#">ENSG00000214447</a>        | c.-1466+6T>A                    | Splice site         | n.a         | n.a                 |
| COPZ2        | <a href="#">ENSG00000005243</a>        | c.16-1delCins(C)2               | Splice site         | n.a         | n.a                 |
| XYLT2        | <a href="#">ENSG00000015532</a>        | c.1942-8_23del(TTTA)4ins(TTTA)3 | Splice site         | n.a         | n.a                 |
| EME1         | <a href="#">ENSG00000154920</a>        | c.567T>A                        | p.N189K             | rs150118812 | 0.0012              |
| LRRC59       | <a href="#">ENSG00000108829</a>        | c.126A>T                        | p.N43I              | rs150118812 | 0.0012              |
| MTMR4        | <a href="#">ENSG00000108389</a>        | c.3029A>G                       | p.D1010G            | rs61742345  | 0.000099            |

n.a.: not available

**Table S3:** Phenotype in TTC25 mutant mice (2 weeks old)

|                                            | 1  | 2  | 3  | 4 | 5 | 6 |
|--------------------------------------------|----|----|----|---|---|---|
| Heart apex on the right side               | x  | -  | x  | x | x | - |
| Reversed lung lobation                     | x  | -  | x  | x | x | - |
| Aortic arch on the right side              | x  | -  | x  | x | x | - |
| Azygos vein on the right side              | x  | -  | x  | x | x | - |
| Stomach on the right side                  | x  | -  | x  | - | x | - |
| Abnormal liver lobation                    | ND | x  | ND | - | x | - |
| Vena cava located to the left of the aorta | -  | x  | ND | - | - | - |
| Slow moving of tracheal cilium             | ND | x  | ND | x | x | x |
| Hydrocephalus                              | ND | ND | ND | x | x | - |
| Small body                                 | ND | x  | x  | x | x | x |

X: defect is present; -: defect is absent; ND: not determined

**Table S4:** Genotypes from intercross of *Ttc25*<sup>+/-</sup> mice (2 weeks-old)

| Line No. | <i>Ttc25</i> <sup>+/+</sup> (%) | <i>Ttc25</i> <sup>+/-</sup> (%) | <i>Ttc25</i> <sup>-/-</sup> (%) | Total     |
|----------|---------------------------------|---------------------------------|---------------------------------|-----------|
| #5       | 13 (33.3%)                      | 22 (56.4%)                      | 4 (10.3%)                       | 39 (100%) |
| #6       | 5 (35.7%)                       | 7 (50.0%)                       | 2 (14.3%)                       | 14 (100%) |

+/+ : wild type; *Ttc25* <sup>+/-</sup> : heterozygous; *Ttc25* <sup>-/-</sup> : homozygous

**Supplemental References:**

24. Saijoh, Y., Adachi, H., Mochida, K., Ohishi, S., Hirao, A., and Hamada, H. (1999). Distinct transcriptional regulatory mechanisms underlie left-right asymmetric expression of *lefty-1* and *lefty-2*. *Genes Dev.* 13, 259–269.
